# Supplementary material
Source: bioRxiv or medRxiv preprint supplement (https://medrxiv.org/highwire/filestream/95794/field_highwire_adjunct_files/1/2020.09.04.20188169-2.pdf)

# Supplementary Figure 2

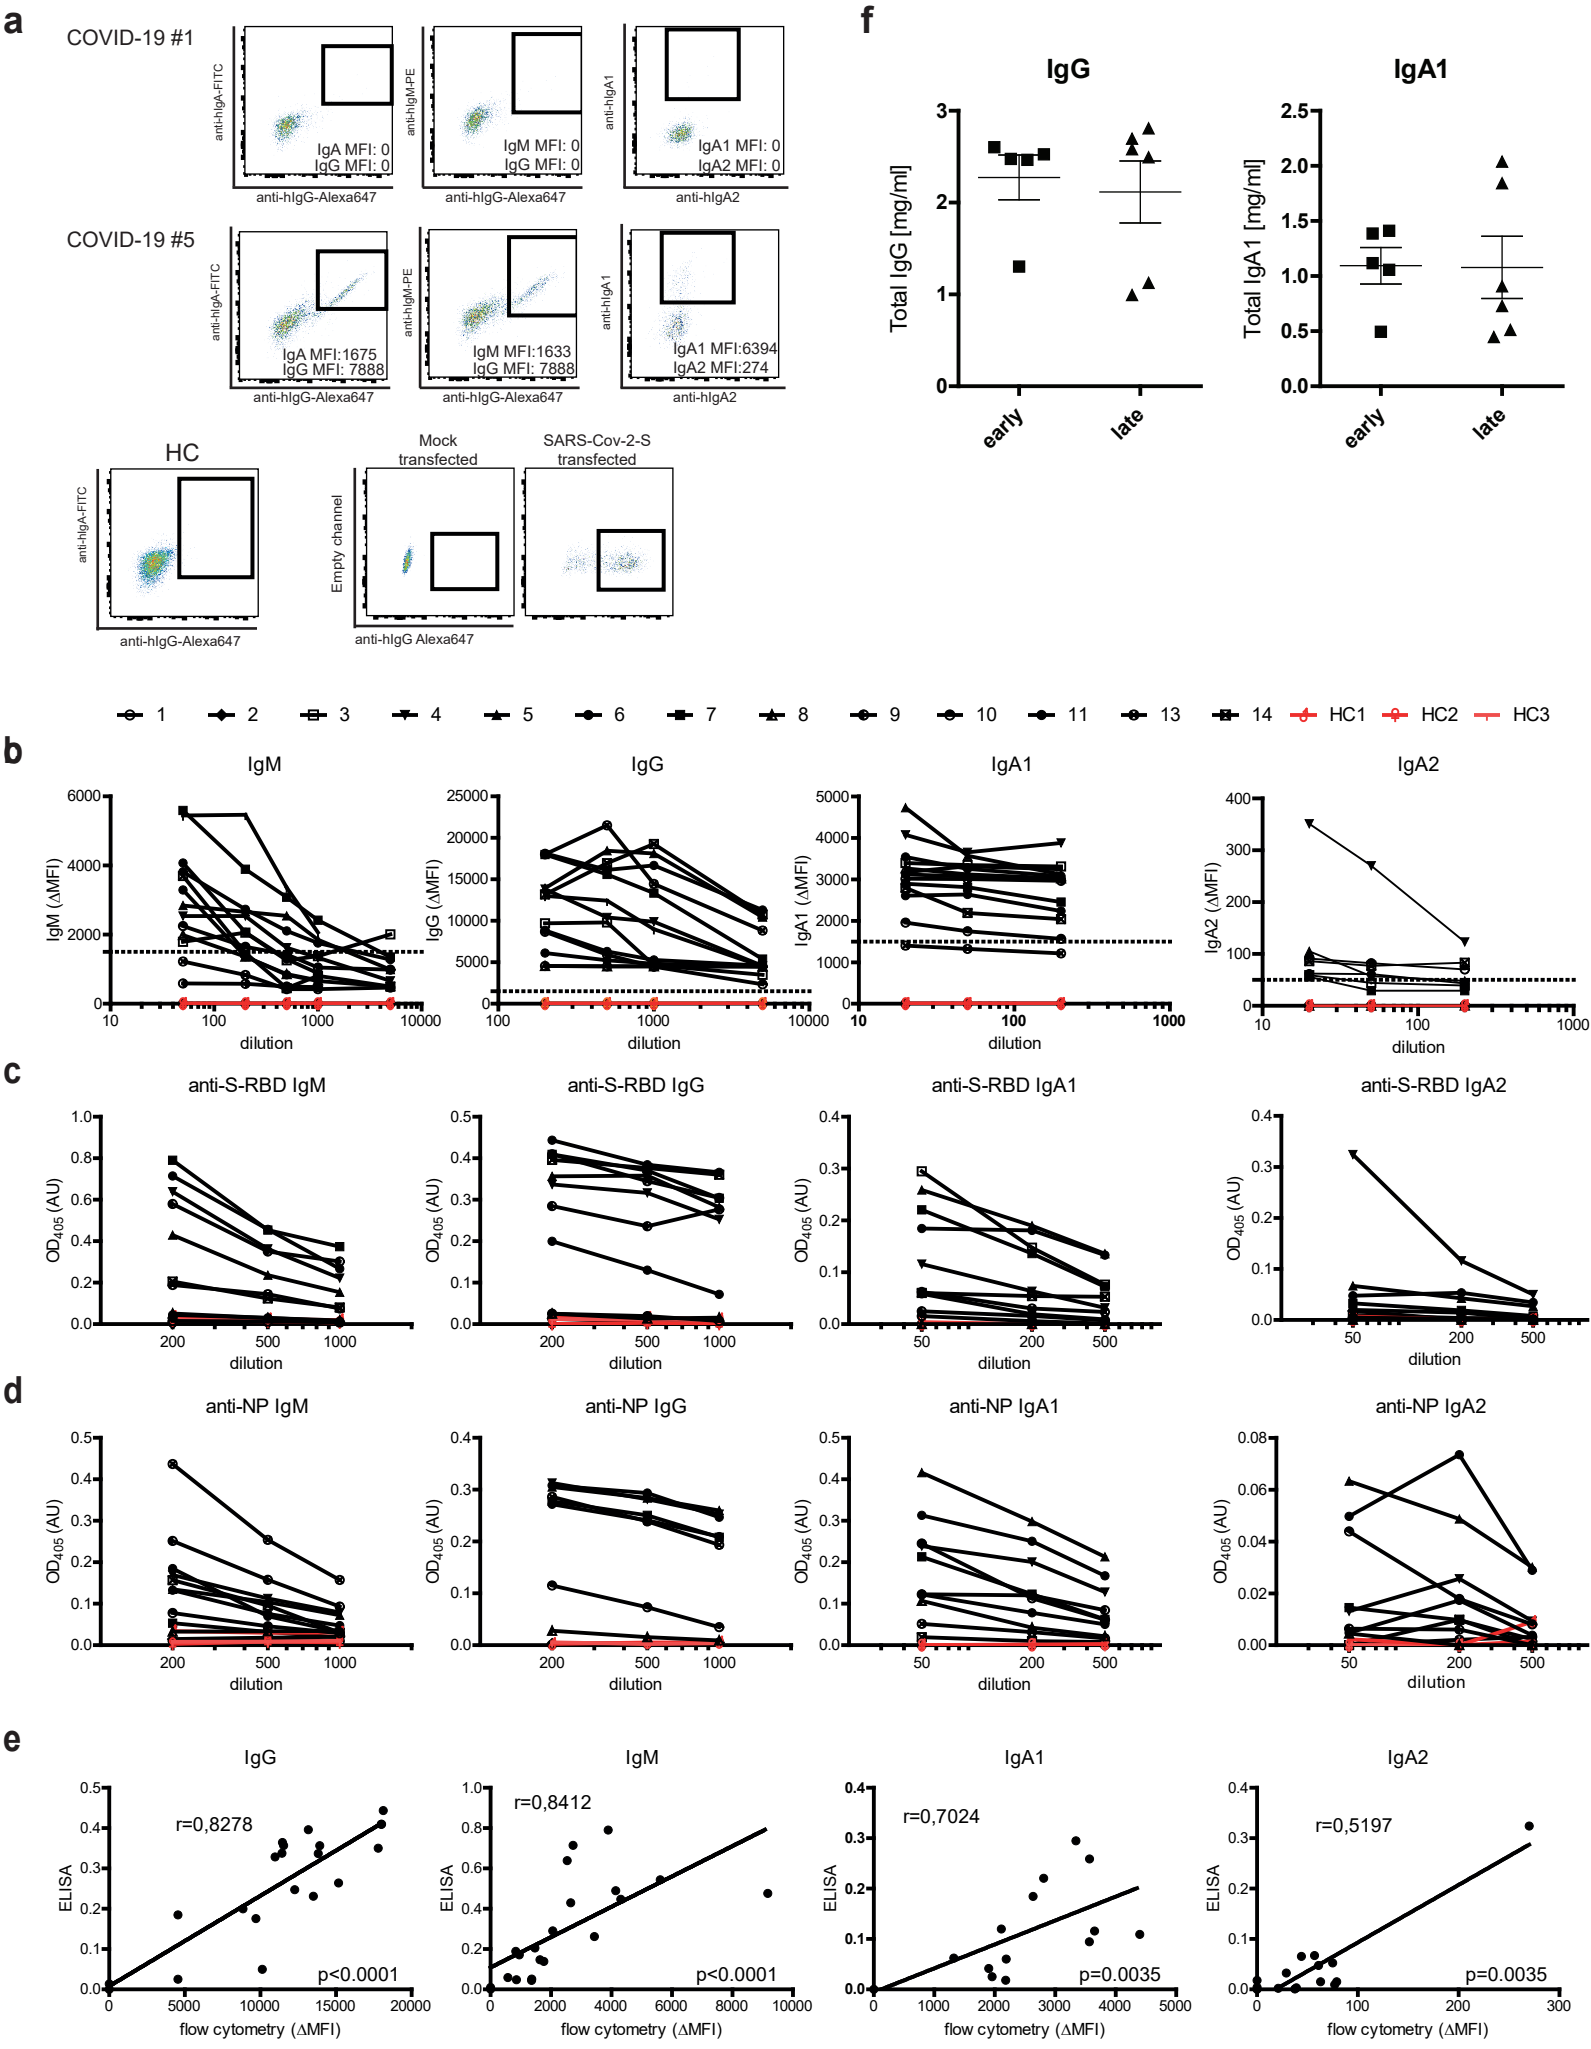

Supplement: Supplementary file [file 2020.09.04.20188169-2.pdf]
